# Supplementary material for: Moderate Perinatal Choline Deficiency Elicits Altered Physiology and Metabolomic Profiles in the Piglet
Source: PubMed Central journal article supplement (PMC4510435; doi:10.1371/journal.pone.0133500), 2015-07-21
Supplement: pone.0133500.s001.pdf [file pone.0133500.s001.pdf]

**S1 Table** Effects of perinatal choline status on clinical hematology profiles of 4-wk-old piglets<sup>1</sup>

| Variable                      | Treatment (Prenatal/Postnatal) |       |       |       | SEM  | <i>P</i> -value <sup>2</sup> |      |            |
|-------------------------------|--------------------------------|-------|-------|-------|------|------------------------------|------|------------|
|                               | CS/CS                          | CS/CD | CD/CS | CD/CD |      | Pre                          | Post | Pre x Post |
| n                             | 8                              | 8     | 5     | 6     |      |                              |      |            |
| RBC, 10 <sup>12</sup> /L      | 5.2                            | 5.4   | 5.4   | 5.4   | 0.2  | 0.56                         | 0.29 | 0.60       |
| Hb, mmol/L                    | 5.54                           | 5.79  | 5.70  | 5.78  | 0.17 | 0.61                         | 0.25 | 0.55       |
| Hematocrit, %                 | 29                             | 30    | 29    | 29    | 0.9  | 0.93                         | 0.32 | 0.82       |
| MCV, fL                       | 55                             | 54    | 54    | 54    | 0.9  | 0.33                         | 0.85 | 0.53       |
| MCH, pg                       | 17                             | 17    | 17    | 17    | 0.3  | 0.85                         | 0.78 | 0.97       |
| MCHC, mmol/L                  | 312                            | 316   | 318   | 317   | 20   | 0.05                         | 0.40 | 0.09       |
| WBC, 10 <sup>9</sup> /L       | 4.6                            | 3.9   | 4.6   | 4.1   | 0.5  | 0.86                         | 0.19 | 0.79       |
| Neutrophils, %WBC             | 36.1                           | 28.5  | 35.8  | 34.9  | 3.8  | 0.37                         | 0.20 | 0.31       |
| Lymphocytes, %WBC             | 59.8                           | 69.5  | 62.0  | 62.6  | 4.2  | 0.52                         | 0.16 | 0.22       |
| Monocytes, %WBC               | 3.4                            | 1.5   | 2.2   | 2.6   | 1.2  | 0.95                         | 0.48 | 0.30       |
| Platelets, 10 <sup>9</sup> /L | 276                            | 255   | 325   | 324   | 43   | 0.14                         | 0.78 | 0.79       |

<sup>1</sup>Values are means of pigs exposed to prenatal and postnatal choline treatments (e.g., CS/CS as the control group) with blood collected from piglets at 27-30 d of age. Differences in treatment replications were due to clotting of blood samples. CD, choline deficient; CS, choline sufficient; Hb, hemoglobin; MCH, mean corpuscular hemoglobin; MCHC, mean corpuscular hemoglobin concentration; MCV; mean corpuscular volume; WBC, white blood cells.

<sup>2</sup>Pre, main effect of prenatal choline status; Post, main effect of postnatal choline status; Pre x Post, interactive effect of prenatal and postnatal choline statuses.
