# Supplementary material for: Moderate Perinatal Choline Deficiency Elicits Altered Physiology and Metabolomic Profiles in the Piglet
Source: PubMed Central journal article supplement (PMC4510435; doi:10.1371/journal.pone.0133500), 2015-07-21
Supplement: pone.0133500.s002.pdf [file pone.0133500.s002.pdf]

**S2 Table** Effects of perinatal choline status on metabolomic profiles of 4-wk-old piglets<sup>1</sup>

| Metabolite                   | Pathway    | Treatment (Prenatal/Postnatal) |                   |                    |                   | SEM  | P-Value <sup>2</sup> |               | Pre x Post  |
|------------------------------|------------|--------------------------------|-------------------|--------------------|-------------------|------|----------------------|---------------|-------------|
|                              |            | CS/CS                          | CS/CD             | CD/CS              | CD/CD             |      | Pre                  | Post          |             |
| 3-(4-hydroxyphenyl)lactate   | Amino Acid | 1.00                           | 0.89              | 0.55               | 0.64              | 0.09 | < <b>0.01</b>        | 0.90          | 0.27        |
| 3-hydroxy-2-ethylpropionate  | Amino Acid | 1.00                           | 0.98              | 0.94               | 0.87              | 0.10 | 0.42                 | 0.69          | 0.80        |
| 3-hydroxyisobutyrate         | Amino Acid | 1.00                           | 0.94              | 0.80               | 0.93              | 0.08 | 0.22                 | 0.71          | 0.27        |
| 3-indoxyl sulfate            | Amino Acid | 1.00                           | 1.07              | 0.94               | 1.02              | 0.19 | 0.70                 | 0.57          | 0.97        |
| 3-methoxytyrosine            | Amino Acid | 1.00                           | 1.16              | 1.15               | 0.99              | 0.09 | 0.93                 | 0.99          | 0.10        |
| 3-methyl-2-oxobutyrate       | Amino Acid | 1.00                           | 1.12              | 1.12               | 1.10              | 0.12 | 0.72                 | 0.68          | 0.58        |
| 3-methyl-2-oxovalerate       | Amino Acid | 1.00                           | 1.03              | 1.03               | 0.94              | 0.08 | 0.71                 | 0.75          | 0.47        |
| 4-hydroxyglutamate           | Amino Acid | 1.00                           | 0.95              | 1.01               | 1.05              | 0.11 | 0.63                 | 0.94          | 0.69        |
| 4-methyl-2-oxopentanoate     | Amino Acid | 1.00                           | 1.13              | 1.25               | 1.17              | 0.10 | 0.16                 | 0.78          | 0.32        |
| 5-oxoproline                 | Amino Acid | 1.00                           | 1.03              | 1.16               | 1.06              | 0.05 | 0.06                 | 0.48          | 0.24        |
| Alanine                      | Amino Acid | 1.00                           | 0.88              | 1.19               | 1.02              | 0.09 | 0.09                 | 0.14          | 0.76        |
| Alpha-hydroxyisovalerate     | Amino Acid | 1.00                           | 0.76              | 0.63               | 0.96              | 0.14 | 0.52                 | 0.74          | 0.05        |
| Arginine                     | Amino Acid | 1.00                           | 0.92              | 0.89               | 0.88              | 0.07 | 0.30                 | 0.52          | 0.66        |
| Asparagine                   | Amino Acid | 1.00                           | 0.93              | 0.88               | 0.68              | 0.08 | <b>0.03</b>          | 0.11          | 0.47        |
| Aspartate                    | Amino Acid | 1.00                           | 0.86              | 0.80               | 0.72              | 0.22 | 0.45                 | 0.60          | 0.89        |
| Beta-alanine                 | Amino Acid | 1.00                           | 0.81              | 1.24               | 0.78              | 0.14 | 0.45                 | <b>0.03</b>   | 0.33        |
| Beta-hydroxypyruvate         | Amino Acid | 1.00                           | 0.75              | 0.85               | 0.82              | 0.08 | 0.65                 | 0.10          | 0.19        |
| Betaine                      | Amino Acid | 1.00                           | 0.23              | 0.94               | 0.20              | 0.04 | 0.26                 | < <b>0.01</b> | 0.65        |
| Carnosine                    | Amino Acid | 1.00 <sup>a</sup>              | 1.17 <sup>b</sup> | 1.12 <sup>ab</sup> | 0.99 <sup>a</sup> | 0.06 | 0.62                 | 0.71          | <b>0.01</b> |
| C-glycosyltryptophan         | Amino Acid | 1.00                           | 1.05              | 1.08               | 0.97              | 0.04 | 0.97                 | 0.52          | 0.04        |
| Citrulline                   | Amino Acid | 1.00                           | 1.01              | 0.71               | 0.82              | 0.08 | < <b>0.01</b>        | 0.44          | 0.53        |
| Cysteine                     | Amino Acid | 1.00                           | 1.03              | 0.88               | 1.04              | 0.09 | 0.54                 | 0.31          | 0.50        |
| Gamma-glutamyl isoleucine    | Amino Acid | 1.00                           | 0.87              | 0.86               | 0.78              | 0.06 | 0.09                 | 0.10          | 0.68        |
| Gamma-glutamyl leucine       | Amino Acid | 1.00                           | 0.95              | 0.83               | 0.81              | 0.12 | 0.21                 | 0.76          | 0.90        |
| Gamma-glutamyl methionine    | Amino Acid | 1.00                           | 0.91              | 1.32               | 0.85              | 0.12 | 0.27                 | <b>0.03</b>   | 0.13        |
| Gamma-glutamyl phenylalanine | Amino Acid | 1.00                           | 0.86              | 0.80               | 0.71              | 0.07 | <b>0.02</b>          | 0.11          | 0.75        |
| Gamma-glutamyl tyrosine      | Amino Acid | 1.00                           | 0.99              | 0.70               | 0.79              | 0.07 | < <b>0.01</b>        | 0.59          | 0.47        |
| Gamma-glutamyl valine        | Amino Acid | 1.00                           | 0.80              | 0.84               | 0.80              | 0.09 | 0.38                 | 0.18          | 0.36        |
| Glutamate                    | Amino Acid | 1.00                           | 0.67              | 0.64               | 0.80              | 0.14 | 0.40                 | 0.53          | 0.08        |
| Glutamine                    | Amino Acid | 1.00                           | 1.13              | 1.15               | 1.20              | 0.05 | <b>0.05</b>          | 0.12          | 0.41        |
| Glycine                      | Amino Acid | 1.00                           | 1.11              | 1.15               | 1.00              | 0.09 | 0.84                 | 0.86          | 0.19        |
| Glycylglycine                | Amino Acid | 1.00                           | 1.19              | 1.12               | 1.05              | 0.12 | 0.92                 | 0.60          | 0.27        |
| Histidine                    | Amino Acid | 1.00                           | 0.97              | 0.84               | 0.83              | 0.05 | <b>0.01</b>          | 0.65          | 0.91        |
| Indolelactate                | Amino Acid | 1.00                           | 0.90              | 0.73               | 0.62              | 0.11 | <b>0.02</b>          | 0.35          | 0.95        |
| Indolepropionate             | Amino Acid | 1.00                           | 0.74              | 0.70               | 0.44              | 0.20 | 0.14                 | 0.19          | 1.00        |
| Isoleucine                   | Amino Acid | 1.00                           | 0.93              | 0.89               | 0.91              | 0.04 | 0.09                 | 0.53          | 0.30        |

|                            |              |      |      |      |      |      |                 |                 |      |
|----------------------------|--------------|------|------|------|------|------|-----------------|-----------------|------|
| Isoleucylglycine           | Amino Acid   | 1.00 | 1.07 | 1.01 | 0.99 | 0.07 | 0.62            | 0.72            | 0.56 |
| Isovalerylglycine          | Amino Acid   | 1.00 | 1.32 | 0.76 | 1.21 | 0.17 | 0.31            | <b>0.03</b>     | 0.72 |
| Kynurenine                 | Amino Acid   | 1.00 | 1.06 | 0.95 | 1.21 | 0.11 | 0.65            | 0.16            | 0.38 |
| Leucine                    | Amino Acid   | 1.00 | 0.90 | 0.92 | 0.92 | 0.08 | 0.72            | 0.59            | 0.56 |
| Levulinate (4-oxovalerate) | Amino Acid   | 1.00 | 1.24 | 1.07 | 1.03 | 0.09 | 0.43            | 0.27            | 0.11 |
| Lysine                     | Amino Acid   | 1.00 | 0.87 | 1.00 | 0.83 | 0.05 | 0.73            | <b>0.01</b>     | 0.77 |
| Methionine                 | Amino Acid   | 1.00 | 1.04 | 0.89 | 0.97 | 0.04 | <b>0.05</b>     | 0.18            | 0.68 |
| N6-acetyllysine            | Amino Acid   | 1.00 | 0.96 | 0.91 | 0.87 | 0.04 | <b>0.03</b>     | 0.28            | 0.95 |
| N-acetylalanine            | Amino Acid   | 1.00 | 1.01 | 0.84 | 0.86 | 0.05 | <b>&lt;0.01</b> | 0.73            | 0.95 |
| N-acetylglycine            | Amino Acid   | 1.00 | 1.65 | 1.12 | 1.63 | 0.19 | 0.79            | <b>0.01</b>     | 0.72 |
| N-acetylmethionine         | Amino Acid   | 1.00 | 0.94 | 0.74 | 0.86 | 0.08 | <b>0.03</b>     | 0.69            | 0.27 |
| N-acetylorithine           | Amino Acid   | 1.00 | 1.10 | 1.02 | 1.07 | 0.07 | 0.97            | 0.34            | 0.71 |
| N-acetylserine             | Amino Acid   | 1.00 | 1.38 | 1.13 | 1.18 | 0.10 | 0.72            | <b>0.04</b>     | 0.09 |
| N-acetylthreonine          | Amino Acid   | 1.00 | 1.04 | 0.86 | 0.91 | 0.06 | <b>0.03</b>     | 0.46            | 0.96 |
| Ornithine                  | Amino Acid   | 1.00 | 0.81 | 0.79 | 0.78 | 0.13 | 0.38            | 0.46            | 0.52 |
| p-cresol sulfate           | Amino Acid   | 1.00 | 1.15 | 1.30 | 1.25 | 0.14 | 0.14            | 0.73            | 0.47 |
| Phenol sulfate             | Amino Acid   | 1.00 | 1.23 | 1.51 | 1.01 | 0.22 | 0.52            | 0.56            | 0.12 |
| Phenylacetate              | Amino Acid   | 1.00 | 1.23 | 1.24 | 1.19 | 0.13 | 0.44            | 0.52            | 0.28 |
| Phenylacetylaspartate      | Amino Acid   | 1.00 | 1.10 | 1.24 | 1.10 | 0.07 | 0.11            | 0.78            | 0.10 |
| Phenylacetylglycine        | Amino Acid   | 1.00 | 1.20 | 1.01 | 1.23 | 0.11 | 0.83            | 0.07            | 0.91 |
| Phenylalanine              | Amino Acid   | 1.00 | 0.96 | 0.86 | 0.79 | 0.06 | <b>0.02</b>     | 0.35            | 0.82 |
| Pipecolate                 | Amino Acid   | 1.00 | 1.01 | 1.00 | 0.87 | 0.05 | 0.15            | 0.23            | 0.16 |
| Pro-hydroxy-pro            | Amino Acid   | 1.00 | 1.13 | 1.34 | 1.29 | 0.08 | <b>&lt;0.01</b> | 0.61            | 0.26 |
| Proline                    | Amino Acid   | 1.00 | 0.94 | 0.99 | 0.92 | 0.03 | 0.62            | 0.06            | 0.73 |
| Pyroglutamine              | Amino Acid   | 1.00 | 1.19 | 0.84 | 1.05 | 0.12 | 0.21            | 0.10            | 0.98 |
| Serine                     | Amino Acid   | 1.00 | 0.79 | 1.00 | 0.79 | 0.07 | 0.99            | <b>&lt;0.01</b> | 0.99 |
| S-methylcysteine           | Amino Acid   | 1.00 | 1.03 | 1.03 | 1.09 | 0.06 | 0.52            | 0.49            | 0.87 |
| Threonine                  | Amino Acid   | 1.00 | 1.06 | 0.87 | 0.96 | 0.10 | 0.27            | 0.47            | 0.90 |
| Trans-4-hydroxyproline     | Amino Acid   | 1.00 | 1.36 | 1.27 | 1.36 | 0.08 | 0.09            | <b>0.01</b>     | 0.10 |
| Tryptophan                 | Amino Acid   | 1.00 | 1.01 | 0.88 | 0.93 | 0.04 | <b>0.01</b>     | 0.46            | 0.70 |
| Tyrosine                   | Amino Acid   | 1.00 | 1.08 | 0.70 | 0.85 | 0.07 | <b>&lt;0.01</b> | 0.09            | 0.59 |
| Urea                       | Amino Acid   | 1.00 | 1.10 | 1.13 | 0.89 | 0.18 | 0.82            | 0.70            | 0.35 |
| Valine                     | Amino Acid   | 1.00 | 0.92 | 0.90 | 0.91 | 0.05 | 0.29            | 0.50            | 0.36 |
| Chenodeoxycholate          | Bile Salt    | 1.00 | 2.90 | 0.61 | 0.53 | 0.89 | 0.13            | 0.32            | 0.27 |
| Glycohyocholate            | Bile Salt    | 1.00 | 0.70 | 0.45 | 6.50 | 2.73 | 0.34            | 0.30            | 0.26 |
| Glycolate                  | Bile Salt    | 1.00 | 0.99 | 0.99 | 0.99 | 0.04 | 0.84            | 0.97            | 0.86 |
| Hyocholate                 | Bile Salt    | 1.00 | 2.36 | 0.71 | 1.44 | 0.69 | 0.39            | 0.14            | 0.65 |
| Hyodeoxycholate            | Bile Salt    | 1.00 | 2.16 | 0.97 | 0.71 | 0.52 | 0.17            | 0.39            | 0.18 |
| Taurochenodeoxycholate     | Bile Salt    | 1.00 | 0.53 | 0.53 | 3.78 | 1.49 | 0.36            | 0.36            | 0.22 |
| 1,5-anhydroglucitol        | Carbohydrate | 1.00 | 1.13 | 1.16 | 1.24 | 0.07 | 0.06            | 0.13            | 0.69 |

|                                          |              |                    |                    |                    |                   |      |                 |                 |             |
|------------------------------------------|--------------|--------------------|--------------------|--------------------|-------------------|------|-----------------|-----------------|-------------|
| 3-phosphoglycerate                       | Carbohydrate | 1.00 <sup>a</sup>  | 1.29 <sup>ab</sup> | 1.41 <sup>b</sup>  | 1.05 <sup>a</sup> | 0.11 | 0.44            | 0.75            | <b>0.01</b> |
| Alpha-ketoglutarate                      | Carbohydrate | 1.00               | 1.21               | 0.84               | 0.92              | 0.13 | 0.10            | 0.28            | 0.63        |
| Citrate                                  | Carbohydrate | 1.00               | 0.94               | 0.82               | 0.83              | 0.08 | 0.09            | 0.79            | 0.64        |
| Erythritol                               | Carbohydrate | 1.00               | 0.97               | 0.88               | 0.99              | 0.11 | 0.63            | 0.72            | 0.55        |
| Erythronate                              | Carbohydrate | 1.00               | 1.02               | 0.95               | 0.97              | 0.04 | 0.27            | 0.69            | 0.97        |
| Fructose                                 | Carbohydrate | 1.00               | 0.89               | 0.80               | 1.05              | 0.12 | 0.87            | 0.58            | 0.15        |
| Fumarate                                 | Carbohydrate | 1.00               | 1.03               | 0.88               | 0.85              | 0.11 | 0.18            | 0.99            | 0.75        |
| Galacitol                                | Carbohydrate | 1.00               | 1.09               | 0.97               | 0.83              | 0.16 | 0.38            | 0.90            | 0.49        |
| Glucose                                  | Carbohydrate | 1.00               | 0.85               | 0.89               | 0.86              | 0.05 | 0.35            | 0.10            | 0.29        |
| Lactate                                  | Carbohydrate | 1.00               | 0.76               | 0.81               | 0.86              | 0.11 | 0.69            | 0.38            | 0.20        |
| Lactose                                  | Carbohydrate | 1.00               | 0.98               | 0.97               | 0.72              | 0.28 | 0.60            | 0.63            | 0.69        |
| Malate                                   | Carbohydrate | 1.00               | 0.58               | 0.46               | 0.48              | 0.19 | 0.10            | 0.32            | 0.25        |
| Mannitol                                 | Carbohydrate | 1.00               | 0.95               | 1.08               | 0.83              | 0.11 | 0.85            | 0.20            | 0.38        |
| Mannose                                  | Carbohydrate | 1.00               | 0.79               | 0.97               | 0.90              | 0.07 | 0.57            | 0.06            | 0.35        |
| Phosphoenolpyruvate                      | Carbohydrate | 1.00 <sup>a</sup>  | 1.46 <sup>ab</sup> | 1.91 <sup>b</sup>  | 1.07 <sup>a</sup> | 0.27 | 0.33            | 0.49            | <b>0.02</b> |
| Pyruvate                                 | Carbohydrate | 1.00               | 1.08               | 1.29               | 1.11              | 0.14 | 0.26            | 0.70            | 0.36        |
| Sorbitol                                 | Carbohydrate | 1.00               | 0.89               | 1.12               | 0.83              | 0.21 | 0.87            | 0.33            | 0.67        |
| Succinate                                | Carbohydrate | 1.00               | 0.32               | 0.26               | 0.24              | 0.35 | 0.25            | 0.33            | 0.36        |
| Creatine                                 | Creatine     | 1.00               | 1.44               | 0.94               | 1.01              | 0.12 | <b>0.05</b>     | <b>0.04</b>     | 0.14        |
| Creatinine                               | Creatine     | 1.00               | 1.02               | 0.87               | 0.99              | 0.04 | 0.07            | 0.12            | 0.24        |
| Guanidinoacetate                         | Creatine     | 1.00               | 0.94               | 1.09               | 0.93              | 0.11 | 0.71            | 0.35            | 0.69        |
| Biliverdin                               | Hemoglobin   | 1.00               | 2.20               | 1.55               | 2.92              | 0.53 | 0.24            | <b>0.02</b>     | 0.87        |
| Heme                                     | Hemoglobin   | 1.00               | 1.23               | 1.24               | 1.18              | 0.22 | 0.68            | 0.71            | 0.49        |
| Myo-inositol                             | Inositol     | 1.00 <sup>ab</sup> | 1.08 <sup>ab</sup> | 1.11 <sup>b</sup>  | 0.92 <sup>a</sup> | 0.06 | 0.70            | 0.37            | <b>0.04</b> |
| Pinitol                                  | Inositol     | 1.00               | 1.54               | 0.61               | 1.26              | 0.18 | 0.08            | <b>&lt;0.01</b> | 0.77        |
| 1,2-propanediol                          | Ketone       | 1.00               | 2.61               | 1.84               | 2.09              | 0.47 | 0.74            | 0.06            | 0.16        |
| 3-hydroxybutyrate                        | Ketone       | 1.00               | 0.73               | 0.76               | 0.72              | 0.15 | 0.43            | 0.33            | 0.45        |
| 10-heptadecenoate (17:1n7)               | Lipid        | 1.00               | 1.91               | 0.99               | 1.45              | 0.30 | 0.44            | <b>0.03</b>     | 0.47        |
| 10-nonadecenoate (19:1n9)                | Lipid        | 1.00               | 1.62               | 1.11               | 1.67              | 0.28 | 0.77            | <b>0.04</b>     | 0.93        |
| 1-arachidonoylglycerophosphocholine      | Lipid        | 1.00               | 0.91               | 0.64               | 0.87              | 0.10 | <b>0.05</b>     | 0.48            | 0.08        |
| 1-arachidonoylglycerophosphoethanolamine | Lipid        | 1.00               | 1.82               | 0.85               | 1.62              | 0.13 | 0.20            | <b>&lt;0.01</b> | 0.86        |
| 1-arachidonoylglycerophosphoinositol     | Lipid        | 1.00 <sup>a</sup>  | 1.50 <sup>b</sup>  | 1.15 <sup>ab</sup> | 1.08 <sup>a</sup> | 0.13 | 0.31            | 0.11            | <b>0.04</b> |
| 1-docosahexaenoylglycerophosphocholine   | Lipid        | 1.00               | 0.90               | 0.75               | 0.96              | 0.08 | 0.07            | 0.99            | 0.25        |
| 1-docosapentaenoylglycerophosphocholine  | Lipid        | 1.00               | 0.71               | 0.61               | 0.52              | 0.10 | <b>0.01</b>     | 0.06            | 0.32        |
| 1-eicosadienoylglycerophosphocholine     | Lipid        | 1.00               | 0.64               | 0.65               | 0.52              | 0.11 | <b>0.03</b>     | <b>0.03</b>     | 0.30        |
| 1-eicosatrienoylglycerophosphocholine    | Lipid        | 1.00               | 0.90               | 0.63               | 0.72              | 0.11 | <b>0.02</b>     | 0.94            | 0.39        |
| 1-heptadecanoylglycerophosphocholine     | Lipid        | 1.00               | 0.64               | 0.44               | 0.41              | 0.15 | <b>0.01</b>     | 0.20            | 0.28        |
| 1-linoleoylglycerol                      | Lipid        | 1.00 <sup>b</sup>  | 0.72 <sup>a</sup>  | 0.57 <sup>a</sup>  | 0.60 <sup>a</sup> | 0.06 | <b>&lt;0.01</b> | <b>0.05</b>     | <b>0.02</b> |
| 1-linoleoylglycerophosphocholine         | Lipid        | 1.00 <sup>b</sup>  | 0.72 <sup>a</sup>  | 0.57 <sup>a</sup>  | 0.60 <sup>a</sup> | 0.06 | <b>&lt;0.01</b> | <b>0.05</b>     | <b>0.02</b> |
| 1-linoleoylglycerophosphoethanolamine    | Lipid        | 1.00               | 1.32               | 0.66               | 0.92              | 0.11 | <b>&lt;0.01</b> | <b>0.01</b>     | 0.79        |

|                                          |       |                    |                    |                   |                   |      |                 |                 |             |
|------------------------------------------|-------|--------------------|--------------------|-------------------|-------------------|------|-----------------|-----------------|-------------|
| 1-methylimidazoleacetate                 | Lipid | 1.00               | 0.98               | 1.05              | 1.03              | 0.11 | 0.64            | 0.83            | 0.99        |
| 1-myristoylglycerophosphocholine         | Lipid | 1.00 <sup>b</sup>  | 0.68 <sup>a</sup>  | 0.55 <sup>a</sup> | 0.73 <sup>a</sup> | 0.09 | <b>0.03</b>     | 0.46            | <b>0.01</b> |
| 1-oleoylglycerophosphocholine            | Lipid | 1.00               | 0.54               | 0.68              | 0.54              | 0.08 | <b>0.05</b>     | <b>&lt;0.01</b> | <b>0.05</b> |
| 1-oleoylglycerophosphoethanolamine       | Lipid | 1.00               | 1.32               | 0.70              | 0.88              | 0.12 | <b>0.01</b>     | <b>0.05</b>     | 0.58        |
| 1-palmitoleoylglycerophosphocholine      | Lipid | 1.00               | 0.64               | 0.59              | 0.56              | 0.07 | <b>&lt;0.01</b> | <b>0.01</b>     | <b>0.03</b> |
| 1-palmitoylglycerophosphocholine         | Lipid | 1.00               | 0.63               | 0.66              | 0.58              | 0.08 | <b>0.03</b>     | <b>0.01</b>     | 0.09        |
| 1-palmitoylglycerophosphoethanolamine    | Lipid | 1.00               | 1.01               | 0.73              | 0.87              | 0.09 | 0.03            | 0.41            | 0.47        |
| 1-palmitoylplasmeneylethanolamine        | Lipid | 1.00               | 0.95               | 1.06              | 0.90              | 0.11 | 0.94            | 0.36            | 0.65        |
| 1-stearoylglycerophosphocholine          | Lipid | 1.00               | 0.81               | 0.34              | 0.66              | 0.14 | <b>0.01</b>     | 0.63            | 0.08        |
| 1-stearoylglycerophosphoethanolamine     | Lipid | 1.00               | 1.06               | 0.91              | 1.11              | 0.08 | 0.79            | 0.12            | 0.42        |
| 1-stearoylglycerophosphoinositol         | Lipid | 1.00               | 1.49               | 0.96              | 1.37              | 0.13 | 0.54            | <b>&lt;0.01</b> | 0.75        |
| 2,3-diphosphoglycerate                   | Lipid | 1.00 <sup>ab</sup> | 1.19 <sup>ab</sup> | 1.88 <sup>b</sup> | 0.78 <sup>a</sup> | 0.30 | 0.45            | 0.15            | <b>0.04</b> |
| 2-aminoadipate                           | Lipid | 1.00               | 0.61               | 0.56              | 0.61              | 0.12 | 0.07            | 0.14            | 0.07        |
| 2-aminobutyrate                          | Lipid | 1.00               | 1.13               | 1.06              | 1.14              | 0.08 | 0.66            | 0.19            | 0.73        |
| 2-arachidonoylglycerophosphoethanolamine | Lipid | 1.00               | 1.75               | 0.92              | 1.46              | 0.11 | 0.10            | <b>&lt;0.01</b> | 0.36        |
| 2-ethylhexanoate                         | Lipid | 1.00               | 0.83               | 0.91              | 0.70              | 0.08 | 0.18            | <b>0.02</b>     | 0.78        |
| 2-hydroxybutyrate                        | Lipid | 1.00               | 0.97               | 0.81              | 0.95              | 0.16 | 0.53            | 0.75            | 0.62        |
| 2-hydroxyglutarate                       | Lipid | 1.00               | 0.87               | 0.60              | 0.72              | 0.11 | <b>0.02</b>     | 0.97            | 0.25        |
| 2-hydroxyisobutyrate                     | Lipid | 1.00               | 0.86               | 0.95              | 0.86              | 0.06 | 0.67            | 0.07            | 0.71        |
| 2-hydroxypalmitate                       | Lipid | 1.00               | 1.50               | 1.28              | 1.34              | 0.16 | 0.70            | 0.08            | 0.17        |
| 2-linoleoylglycerophosphocholine         | Lipid | 1.00               | 0.66               | 0.57              | 0.50              | 0.08 | <b>&lt;0.01</b> | <b>0.01</b>     | 0.09        |
| 2-linoleoylglycerophosphoethanolamine    | Lipid | 1.00               | 1.29               | 0.69              | 0.90              | 0.11 | <b>&lt;0.01</b> | <b>0.03</b>     | 0.69        |
| 2-oleoylglycerophosphoethanolamine       | Lipid | 1.00               | 1.21               | 0.65              | 0.78              | 0.12 | <b>&lt;0.01</b> | 0.16            | 0.77        |
| 2-palmitoylglycerophosphocholine         | Lipid | 1.00 <sup>b</sup>  | 0.59 <sup>a</sup>  | 0.57 <sup>a</sup> | 0.55 <sup>a</sup> | 0.08 | <b>&lt;0.01</b> | <b>0.01</b>     | <b>0.01</b> |
| 2-stearoylglycerophosphocholine          | Lipid | 1.00               | 0.65               | 0.55              | 0.55              | 0.15 | 0.07            | 0.25            | 0.25        |
| 3-dehydrocarnitine                       | Lipid | 1.00 <sup>ab</sup> | 1.49 <sup>c</sup>  | 0.98 <sup>a</sup> | 1.18 <sup>b</sup> | 0.06 | <b>0.02</b>     | <b>&lt;0.01</b> | <b>0.04</b> |
| 3-hydroxybutyrate                        | Lipid | 1.00               | 0.94               | 0.80              | 0.93              | 0.08 | 0.22            | 0.71            | 0.27        |
| 3-hydroxypropanoate                      | Lipid | 1.00               | 0.70               | 0.87              | 1.48              | 0.35 | 0.36            | 0.65            | 0.20        |
| 3-phosphoglycerate                       | Lipid | 1.00 <sup>a</sup>  | 1.29 <sup>ab</sup> | 1.41 <sup>b</sup> | 1.05 <sup>a</sup> | 0.11 | 0.44            | 0.75            | <b>0.01</b> |
| 7-alpha-hydroxy-3-oxo-4-cholestenoate    | Lipid | 1.00               | 1.92               | 1.26              | 2.52              | 0.81 | 0.60            | 0.19            | 0.84        |
| 7-beta-hydroxycholesterol                | Lipid | 1.00               | 0.70               | 1.14              | 0.87              | 0.12 | 0.24            | <b>0.03</b>     | 0.92        |
| Acetylcarnitine                          | Lipid | 1.00 <sup>a</sup>  | 1.85 <sup>c</sup>  | 0.88 <sup>a</sup> | 1.36 <sup>b</sup> | 0.08 | <b>&lt;0.01</b> | <b>&lt;0.01</b> | <b>0.03</b> |
| Adrenic Acid (22:4n6)                    | Lipid | 1.00               | 1.22               | 1.25              | 1.14              | 0.12 | 0.48            | 0.65            | 0.17        |
| Alpha-linolenic Acid (18:3n3)            | Lipid | 1.00               | 2.27               | 0.88              | 1.20              | 0.36 | 0.11            | <b>0.04</b>     | 0.20        |
| Arachidonic Acid (20:4n6)                | Lipid | 1.00               | 1.50               | 1.07              | 1.22              | 0.13 | 0.42            | <b>0.02</b>     | 0.20        |
| Caprylate (10:0)                         | Lipid | 1.00               | 1.13               | 1.05              | 0.96              | 0.10 | 0.59            | 0.86            | 0.29        |
| Carnitine                                | Lipid | 1.00               | 3.05               | 1.16              | 2.69              | 0.14 | 0.46            | <b>&lt;0.01</b> | 0.06        |
| Cholesterol                              | Lipid | 1.00               | 0.93               | 1.00              | 0.94              | 0.05 | 0.85            | 0.21            | 0.91        |
| Choline                                  | Lipid | 1.00               | 0.54               | 0.94              | 0.45              | 0.05 | 0.13            | <b>&lt;0.01</b> | 0.72        |
| Cis-vaccenate (18:1n7)                   | Lipid | 1.00               | 1.13               | 0.96              | 1.16              | 0.12 | 0.94            | 0.18            | 0.78        |

|                                 |            |                   |                    |                    |                    |      |      |                 |                 |
|---------------------------------|------------|-------------------|--------------------|--------------------|--------------------|------|------|-----------------|-----------------|
| Deoxycarnitine                  | Lipid      | 1.00 <sup>a</sup> | 1.25 <sup>b</sup>  | 1.21 <sup>b</sup>  | 0.98 <sup>a</sup>  | 0.05 | 0.61 | 0.85            | <b>&lt;0.01</b> |
| Dimethylglycine                 | Lipid      | 1.00              | 0.10               | 0.87               | 0.17               | 0.06 | 0.63 | <b>&lt;0.01</b> | 0.11            |
| Docosadienoic Acid (22:2n6)     | Lipid      | 1.00              | 1.63               | 1.34               | 1.73               | 0.19 | 0.25 | <b>0.01</b>     | 0.54            |
| Docosahexaenoic Acid (22:6n3)   | Lipid      | 1.00              | 1.71               | 1.05               | 1.25               | 0.16 | 0.21 | <b>0.01</b>     | 0.13            |
| Docosapentanoic Acid (22:5n6)   | Lipid      | 1.00              | 1.37               | 1.31               | 1.38               | 0.20 | 0.44 | 0.30            | 0.47            |
| Dodecanedioate                  | Lipid      | 1.00              | 1.23               | 1.01               | 1.20               | 0.10 | 0.92 | <b>0.05</b>     | 0.85            |
| Eicosadienoic Acid (20:2n6)     | Lipid      | 1.00              | 1.83               | 1.30               | 1.93               | 0.35 | 0.58 | <b>0.05</b>     | 0.78            |
| Eicosanoate (20:1n9/n11)        | Lipid      | 1.00              | 2.24               | 1.31               | 2.42               | 0.49 | 0.62 | <b>0.02</b>     | 0.89            |
| Eicosapentaenoic Acid (22:5n3)  | Lipid      | 1.00              | 1.35               | 1.22               | 1.22               | 0.16 | 0.78 | 0.27            | 0.27            |
| Eicosatrienoic acid (20:3n3/n6) | Lipid      | 1.00              | 1.65               | 1.35               | 1.77               | 0.24 | 0.33 | <b>0.03</b>     | 0.64            |
| Glycerate                       | Lipid      | 1.00              | 1.05               | 1.06               | 0.94               | 0.08 | 0.80 | 0.67            | 0.33            |
| Glycerol                        | Lipid      | 1.00              | 0.87               | 0.83               | 0.87               | 0.10 | 0.40 | 0.66            | 0.35            |
| Glycerol-3-phosphate            | Lipid      | 1.00              | 0.16               | 0.89               | 0.33               | 0.33 | 0.92 | <b>0.04</b>     | 0.67            |
| Glycerophosphocholine           | Lipid      | 1.00              | 0.74               | 0.73               | 0.58               | 0.18 | 0.25 | 0.27            | 0.75            |
| Heptanoate (7:0)                | Lipid      | 1.00              | 1.10               | 1.15               | 1.08               | 0.09 | 0.46 | 0.83            | 0.37            |
| Lathosterol                     | Lipid      | 1.00              | 0.85               | 0.74               | 0.93               | 0.12 | 0.49 | 0.88            | 0.18            |
| Laurate (12:0)                  | Lipid      | 1.00              | 1.03               | 0.93               | 0.83               | 0.09 | 0.17 | 0.70            | 0.51            |
| Linoleic Acid (18:2n6)          | Lipid      | 1.00              | 1.99               | 0.89               | 1.23               | 0.32 | 0.19 | <b>0.05</b>     | 0.32            |
| Margarate (17:0)                | Lipid      | 1.00              | 1.25               | 0.99               | 1.14               | 0.11 | 0.58 | 0.07            | 0.63            |
| Methyl-stearate                 | Lipid      | 1.00              | 0.55               | 1.05               | 0.63               | 0.20 | 0.73 | <b>0.03</b>     | 0.94            |
| Myristate (14:0)                | Lipid      | 1.00              | 1.44               | 0.91               | 0.99               | 0.15 | 0.08 | 0.08            | 0.24            |
| Myristoleate (14:1n5)           | Lipid      | 1.00              | 0.97               | 0.91               | 0.80               | 0.09 | 0.14 | 0.43            | 0.64            |
| Nonadecanoate (19:0)            | Lipid      | 1.00              | 1.34               | 1.18               | 1.23               | 0.12 | 0.79 | 0.13            | 0.25            |
| Oleate (18:1n9)                 | Lipid      | 1.00              | 1.39               | 0.94               | 1.34               | 0.19 | 0.77 | <b>0.05</b>     | 0.98            |
| Palmitate (16:0)                | Lipid      | 1.00              | 1.35               | 1.01               | 1.27               | 0.14 | 0.82 | <b>0.04</b>     | 0.75            |
| Palmitoleate (16:1n7)           | Lipid      | 1.00              | 2.38               | 0.94               | 1.28               | 0.34 | 0.10 | <b>0.02</b>     | 0.14            |
| Palmitoyl sphingomyelin         | Lipid      | 1.00              | 0.85               | 1.11               | 1.08               | 0.09 | 0.07 | 0.34            | 0.51            |
| Pelargonate (9:0)               | Lipid      | 1.00              | 1.08               | 1.07               | 0.98               | 0.09 | 0.88 | 0.94            | 0.35            |
| Propionylcarnitine              | Lipid      | 1.00              | 1.56               | 0.67               | 1.38               | 0.14 | 0.08 | <b>&lt;0.01</b> | 0.61            |
| Sarcosine                       | Lipid      | 1.00              | 0.66               | 1.02               | 0.58               | 0.11 | 0.76 | <b>&lt;0.01</b> | 0.65            |
| Stearate (18:0)                 | Lipid      | 1.00              | 1.35               | 1.04               | 1.34               | 0.12 | 0.90 | <b>0.01</b>     | 0.83            |
| Stearoyl sphingomyelin          | Lipid      | 1.00              | 0.94               | 1.09               | 1.17               | 0.12 | 0.19 | 0.96            | 0.56            |
| Succinylcarnitine               | Lipid      | 1.00 <sup>a</sup> | 1.44 <sup>b</sup>  | 1.24 <sup>ab</sup> | 1.23 <sup>ab</sup> | 0.09 | 0.87 | <b>0.02</b>     | <b>0.02</b>     |
| Undecanoate (11:0)              | Lipid      | 1.00              | 1.05               | 1.16               | 1.16               | 0.08 | 0.10 | 0.75            | 0.75            |
| 2'-deoxycytidine                | Nucleotide | 1.00              | 1.08               | 1.06               | 0.95               | 0.06 | 0.53 | 0.84            | 0.12            |
| 2'-deoxyuridine                 | Nucleotide | 1.00              | 0.88               | 1.20               | 0.92               | 0.13 | 0.37 | 0.14            | 0.55            |
| 5,6-dihydrouracil               | Nucleotide | 1.00              | 1.02               | 1.34               | 1.05               | 0.11 | 0.10 | 0.24            | 0.17            |
| Adenine                         | Nucleotide | 1.00              | 0.83               | 0.94               | 0.75               | 0.11 | 0.51 | 0.10            | 0.91            |
| Adenosine 5'-monophosphate      | Nucleotide | 1.00 <sup>a</sup> | 2.42 <sup>ab</sup> | 2.78 <sup>b</sup>  | 0.75 <sup>a</sup>  | 0.57 | 0.92 | 0.60            | <b>0.01</b>     |
| Allantoin                       | Nucleotide | 1.00              | 0.99               | 1.06               | 1.05               | 0.08 | 0.45 | 0.92            | 1.00            |

|                                   |            |                   |                    |                   |                    |      |                 |                 |             |
|-----------------------------------|------------|-------------------|--------------------|-------------------|--------------------|------|-----------------|-----------------|-------------|
| Cytidine                          | Nucleotide | 1.00              | 0.73               | 0.85              | 0.79               | 0.10 | 0.64            | 0.12            | 0.31        |
| Dihydroorotate                    | Nucleotide | 1.00              | 0.82               | 0.92              | 0.54               | 0.09 | <b>0.04</b>     | <b>&lt;0.01</b> | 0.26        |
| Flavin-adenine dinucleotide (FAD) | Nucleotide | 1.00              | 0.98               | 1.21              | 0.94               | 0.07 | 0.25            | <b>0.05</b>     | 0.09        |
| Guanine                           | Nucleotide | 1.00              | 0.63               | 0.72              | 0.69               | 0.11 | 0.34            | 0.09            | 0.15        |
| Guanosine                         | Nucleotide | 1.00              | 0.67               | 0.66              | 0.54               | 0.22 | 0.29            | 0.32            | 0.64        |
| Hypoxanthine                      | Nucleotide | 1.00              | 0.83               | 0.81              | 0.75               | 0.07 | 0.07            | 0.13            | 0.47        |
| Inosine                           | Nucleotide | 1.00              | 1.18               | 1.03              | 0.79               | 0.17 | 0.29            | 0.88            | 0.23        |
| Methylguanine7                    | Nucleotide | 1.00              | 0.98               | 0.89              | 0.90               | 0.10 | 0.31            | 0.97            | 0.90        |
| N1-methyladenosine                | Nucleotide | 1.00              | 1.10               | 0.93              | 1.06               | 0.05 | 0.32            | <b>0.05</b>     | 0.82        |
| N1-methylguanosine                | Nucleotide | 1.00              | 1.03               | 1.16              | 1.07               | 0.09 | 0.29            | 0.75            | 0.52        |
| N2-methylguanosine                | Nucleotide | 1.00              | 1.07               | 0.99              | 0.90               | 0.05 | 0.07            | 0.91            | 0.12        |
| N4-acetylcytidine                 | Nucleotide | 1.00              | 1.29               | 0.98              | 1.06               | 0.10 | 0.23            | 0.08            | 0.30        |
| N6-carbamoylthreonyladenosine     | Nucleotide | 1.00              | 0.98               | 0.93              | 1.02               | 0.05 | 0.78            | 0.51            | 0.30        |
| Pseudouridine                     | Nucleotide | 1.00              | 1.07               | 1.08              | 1.02               | 0.03 | 0.66            | 0.79            | <b>0.05</b> |
| Ribitol                           | Nucleotide | 1.00              | 0.63               | 0.56              | 0.58               | 0.13 | 0.08            | 0.20            | 0.15        |
| Ribose                            | Nucleotide | 1.00              | 0.98               | 1.11              | 0.88               | 0.14 | 0.98            | 0.39            | 0.46        |
| Ribulose                          | Nucleotide | 1.00              | 0.78               | 0.71              | 0.63               | 0.11 | <b>0.05</b>     | 0.19            | 0.54        |
| Threitol                          | Nucleotide | 1.00              | 1.07               | 1.08              | 1.03               | 0.05 | 0.70            | 0.86            | 0.18        |
| Thymidine                         | Nucleotide | 1.00              | 0.97               | 1.10              | 0.99               | 0.10 | 0.55            | 0.48            | 0.65        |
| Urate                             | Nucleotide | 1.00              | 0.56               | 0.51              | 0.73               | 0.19 | 0.40            | 0.56            | 0.09        |
| Uridine                           | Nucleotide | 1.00              | 0.85               | 0.92              | 0.88               | 0.07 | 0.74            | 0.20            | 0.44        |
| Xanthine                          | Nucleotide | 1.00              | 0.59               | 0.53              | 0.64               | 0.22 | 0.36            | 0.50            | 0.25        |
| Xylitol                           | Nucleotide | 1.00              | 0.88               | 1.00              | 0.83               | 0.08 | 0.72            | 0.08            | 0.75        |
| Xylonate                          | Nucleotide | 1.00              | 0.90               | 0.92              | 0.86               | 0.07 | 0.41            | 0.22            | 0.75        |
| Xylose                            | Nucleotide | 1.00              | 0.85               | 1.04              | 0.81               | 0.07 | 0.93            | <b>0.01</b>     | 0.56        |
| 4-hydroxyhippurate                | Other      | 1.00 <sup>c</sup> | 0.81 <sup>b</sup>  | 0.66 <sup>a</sup> | 0.67 <sup>a</sup>  | 0.04 | <b>&lt;0.01</b> | <b>0.04</b>     | <b>0.03</b> |
| Benzoate                          | Other      | 1.00              | 1.15               | 1.01              | 1.11               | 0.07 | 0.87            | 0.10            | 0.77        |
| Benzyl alcohol                    | Other      | 1.00              | 7.50               | 3.29              | 6.11               | 2.06 | 0.83            | <b>0.03</b>     | 0.38        |
| Catechol sulfate                  | Other      | 1.00              | 1.01               | 0.68              | 0.99               | 0.13 | 0.18            | 0.21            | 0.25        |
| Cinnamoylglycine                  | Other      | 1.00              | 1.09               | 0.88              | 1.77               | 0.32 | 0.38            | 0.13            | 0.22        |
| EDTA                              | Other      | 1.00              | 1.11               | 1.01              | 1.37               | 0.15 | 0.36            | 0.13            | 0.39        |
| Gulono-1,4-lactone                | Other      | 1.00              | 1.03               | 1.01              | 1.18               | 0.13 | 0.56            | 0.47            | 0.61        |
| Hippurate                         | Other      | 1.00 <sup>b</sup> | 0.57 <sup>ab</sup> | 0.35 <sup>a</sup> | 0.81 <sup>ab</sup> | 0.21 | 0.35            | 0.96            | <b>0.04</b> |
| Homostachydrine                   | Other      | 1.00              | 0.61               | 1.07              | 0.58               | 0.04 | 0.74            | <b>&lt;0.01</b> | 0.26        |
| Iminodiacetate                    | Other      | 1.00              | 1.23               | 1.13              | 1.45               | 0.13 | 0.18            | <b>0.04</b>     | 0.72        |
| Inosine-5'-diphosphate            | Other      | 1.00              | 1.05               | 0.92              | 0.92               | 0.09 | 0.24            | 0.74            | 0.80        |
| Ketamine                          | Other      | 1.00              | 1.68               | 1.67              | 1.33               | 0.28 | 0.57            | 0.56            | 0.08        |
| Oxalate (ethanedioate)            | Other      | 1.00              | 1.00               | 0.82              | 0.87               | 0.12 | 0.21            | 0.81            | 0.83        |
| Phosphate                         | Other      | 1.00              | 1.00               | 1.07              | 1.02               | 0.03 | 0.13            | 0.34            | 0.33        |
| Pyrophosphate                     | Other      | 1.00              | 1.22               | 1.20              | 1.24               | 0.13 | 0.41            | 0.33            | 0.50        |

|                  |         |                    |                   |                   |                   |      |      |      |             |
|------------------|---------|--------------------|-------------------|-------------------|-------------------|------|------|------|-------------|
| Threonate        | Other   | 1.00               | 0.98              | 1.04              | 1.09              | 0.11 | 0.46 | 0.89 | 0.73        |
| Alpha-tocopherol | Vitamin | 1.00               | 0.55              | 0.76              | 0.74              | 0.12 | 0.85 | 0.06 | 0.08        |
| Nicotinamide     | Vitamin | 1.00               | 1.11              | 0.95              | 1.07              | 0.10 | 0.69 | 0.26 | 0.93        |
| Pantothenate     | Vitamin | 1.00 <sup>ab</sup> | 1.05 <sup>b</sup> | 1.06 <sup>b</sup> | 0.86 <sup>a</sup> | 0.05 | 0.21 | 0.18 | <b>0.03</b> |
| Quinolate        | Vitamin | 1.00               | 1.12              | 1.07              | 1.34              | 0.17 | 0.79 | 0.59 | 0.87        |

<sup>abc</sup>Means within a row and without a common superscript differ ( $P < 0.05$ ).

<sup>1</sup>Values are means of 8 replicate pigs exposed to prenatal and postnatal choline treatments (e.g., CS/CS as the control group) with blood collected from piglets at 27-30 d of age. Data presented as fold-change relative to CS/CS treatment group. CD, choline deficient; CS, choline sufficient.

<sup>2</sup>Pre, main effect of prenatal choline status; Post, main effect of postnatal choline status; Pre x Post, interactive effect of prenatal and postnatal choline statuses.
